# Supplementary material for: Catalytic evaluation and in vitro bacterial inactivation of graphitic carbon nitride/carbon sphere doped bismuth oxide quantum dots with evidential in silico analysis
Source: PubMed Central journal article supplement — RSC Adv. 2023 Aug 23;13(36):25305–15. doi: 10.1039/d3ra04664h (PMC10445278; doi:10.1039/d3ra04664h), 2023-08-23
Supplement: RA-013-D3RA04664H-s001.pdf [file RA-013-D3RA04664H-s001.pdf]

## Supplementary Materials

### **Catalytic evaluation and in-vitro bacterial inactivation of graphitic carbon nitride/carbon spheres doped bismuth oxide quantum dots with evidential in-silico analysis**

Muhammad Ikram<sup>a</sup>, Muhammad Shazaib<sup>b</sup>, Ali Haider<sup>c</sup>, Anum Shahzadi<sup>d</sup>, Shair Baz<sup>a</sup>, Mohammed M Algaradah<sup>e</sup>, Anwar Ul-Hamid<sup>f</sup>, Walid Nabgan<sup>g</sup>, Hisham S.M. Abd-Rabboh<sup>h</sup>, Salamat Ali<sup>b</sup>

<sup>a</sup>Solar Cell Applications Research Lab, Department of Physics, Government College University Lahore, 54000, Pakistan

<sup>b</sup>Department of Physics, Riphah Institute of Computing and Applied Sciences (RICAS), Riphah International University, 14 Ali Road, Lahore, Pakistan

<sup>c</sup>Department of Clinical Sciences, Faculty of Veterinary and Animal Sciences, Muhammad Nawaz Shareef University of Agriculture, Multan, 66000, Pakistan

<sup>f</sup>Faculty of Pharmacy, The University of Lahore, Lahore, 54000, Pakistan

<sup>e</sup>Chemistry Department, Faculty of Science, King Khalid University, P.O. Box 9004, Abha 61413, Saudi Arabia

<sup>f</sup>Core Research Facilities, King Fahd University of Petroleum & Minerals, Dhahran 31261, Saudi Arabia

<sup>g</sup>Departament d'Enginyeria Química, Universitat Rovira i Virgili, Av Països Catalans 26, 43007 Tarragona, Spain

\*Corresponding author email: [dr.muhammadiqram@gcu.edu.pk](mailto:dr.muhammadiqram@gcu.edu.pk)

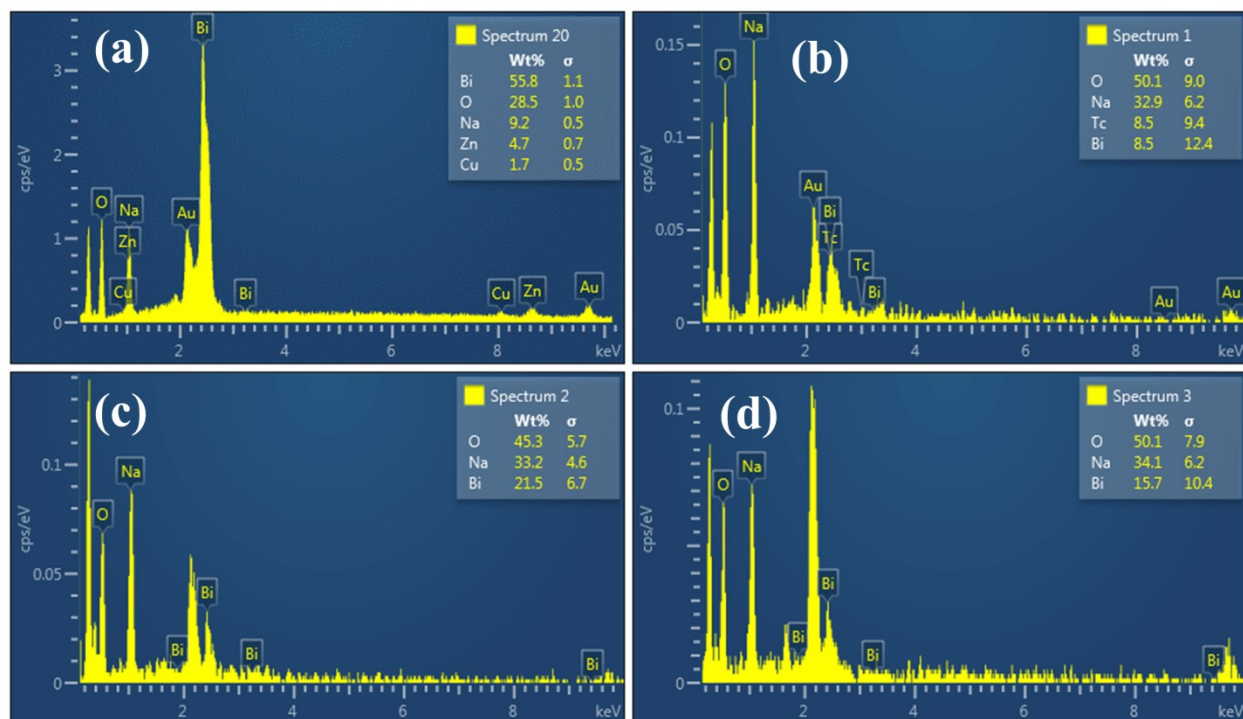

**Fig. S1** The elemental mapping of (a)  $\text{Bi}_2\text{O}_3$  (b)  $\text{CS-Bi}_2\text{O}_3$  (c) (3 wt. %)  $\text{g-C}_3\text{N}_4/\text{CS-Bi}_2\text{O}_3$  (d) (6 wt.%)  $\text{g-C}_3\text{N}_4/\text{CS-Bi}_2\text{O}_3$  QDs

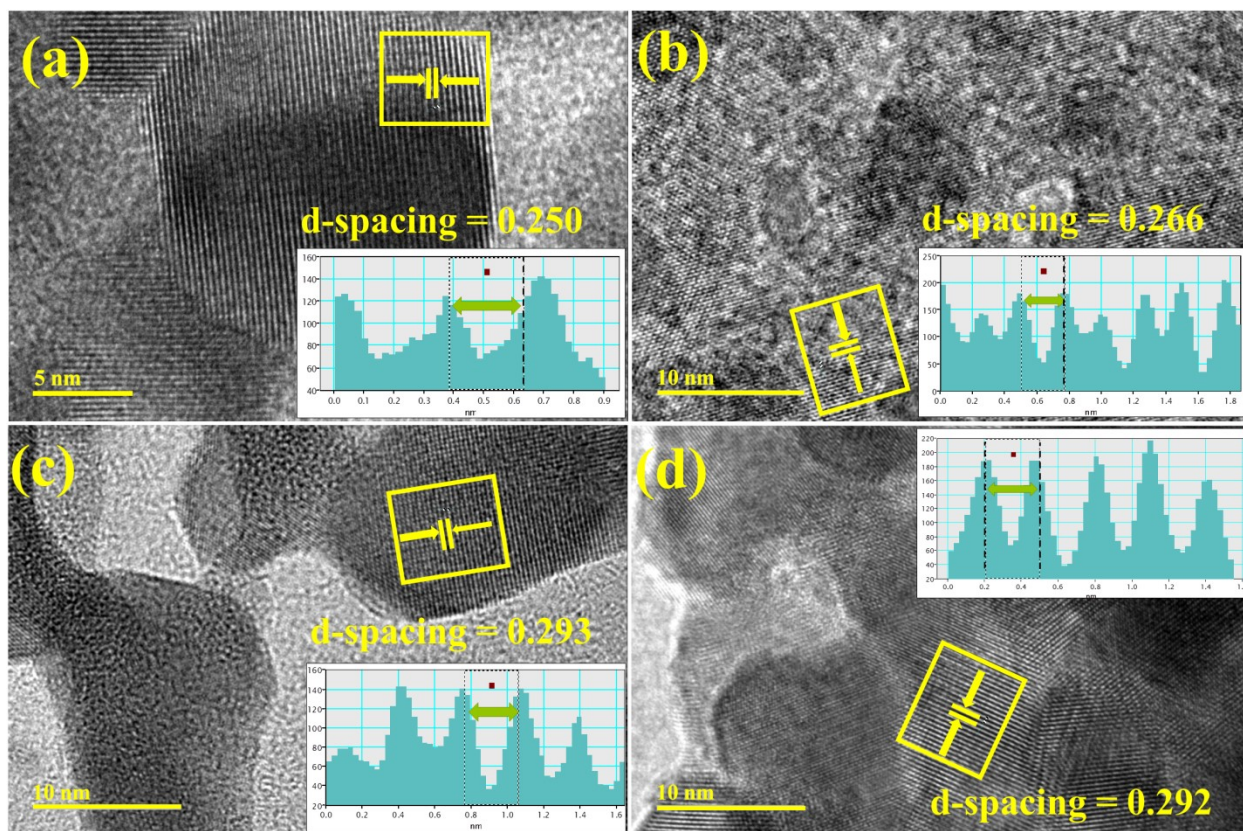

**Fig. S2** HR-TEM images of (a) Bi<sub>2</sub>O<sub>3</sub> (b) CS-Bi<sub>2</sub>O<sub>3</sub> (c) (3 wt.%) g-C<sub>3</sub>N<sub>4</sub>/CS-Bi<sub>2</sub>O<sub>3</sub> (d) (6 wt.%)

g-C<sub>3</sub>N<sub>4</sub>/CS-Bi<sub>2</sub>O<sub>3</sub> QDs

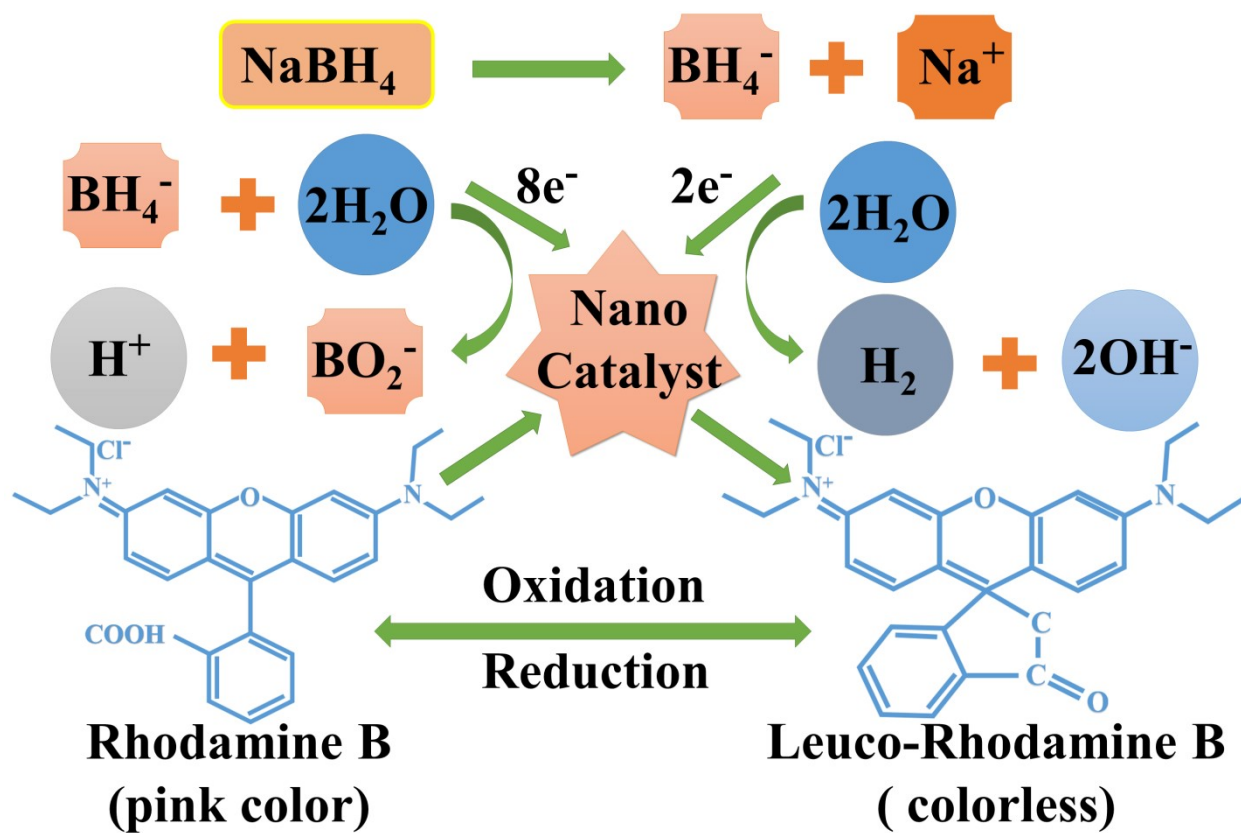

Fig. S3 Catalysis mechanism of prepared quantum dots

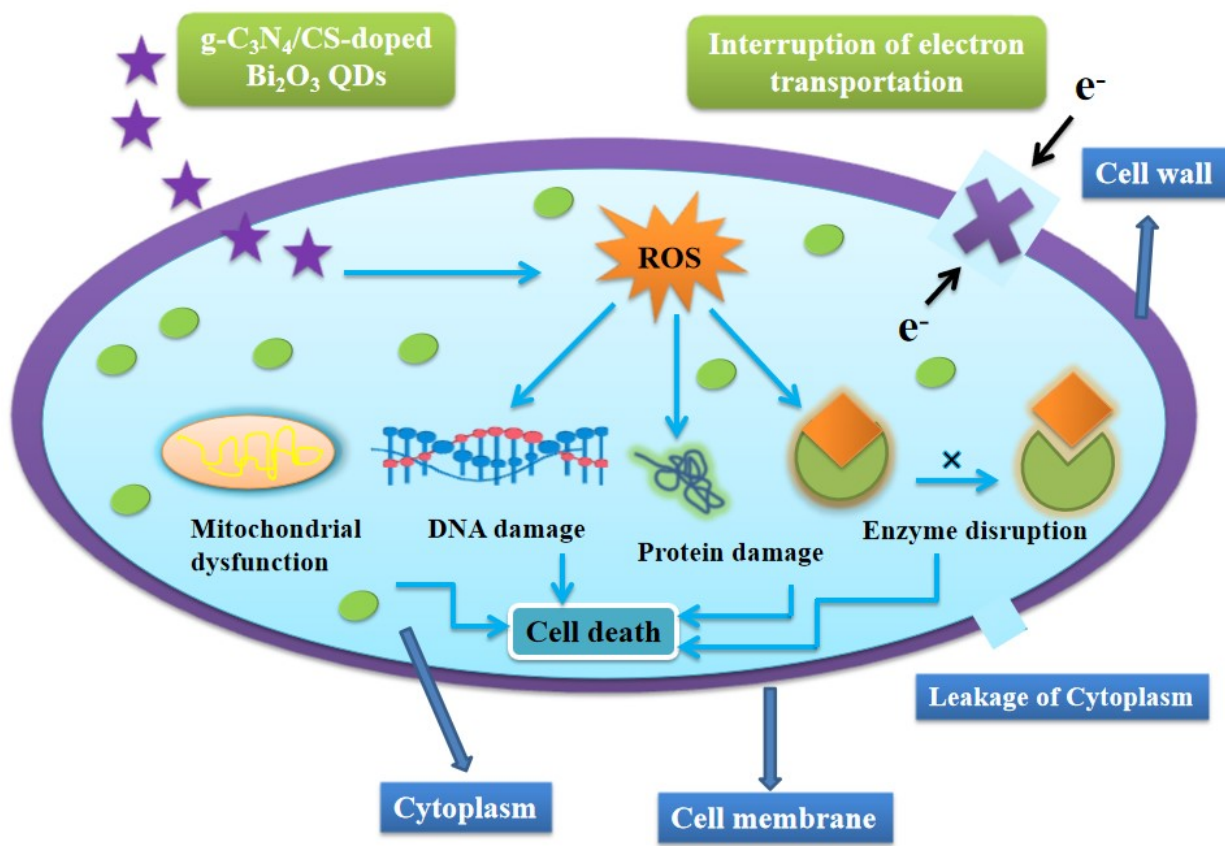

**Fig. S4** The antibacterial mechanism of synthesized CS and g-C<sub>2</sub>N<sub>4</sub> doped Bi<sub>2</sub>O<sub>3</sub>
